# Supplementary material for: In situ growth of a 2D/3D mixed perovskite interface layer by seed-mediated and solvent-assisted Ostwald ripening for stable and efficient photovoltaics
Source: Royal Society of Chemistry journal article supplement (doi:10.1039/c9tc05212g), 2019-12-31
Supplement: c9tc05212g1.pdf [file c9tc05212g1.pdf]

## Supplementary Information

### Situ growth of 2D/3D mixture perovskite interface layer by seed-mediated and solvent-assisted Ostwald ripening for stable and efficient photovoltaics

Shiqi Li,<sup>a†</sup> Lina Hu,<sup>a†</sup> Chenxi Zhang,<sup>a</sup> Yukun Wu<sup>a</sup>, Yifan Liu<sup>a</sup>, Qinjun Sun,<sup>a</sup> Yanxia Cui,<sup>a</sup> Yuying Hao,<sup>\*a, b</sup> Yucheng Wu<sup>b\*</sup>

<sup>a</sup> College of Physics and Optoelectronics, Key Lab of Advanced Transducers and Intelligent Control System, Taiyuan University of Technology, Taiyuan 030024, China.

<sup>b</sup> Key Laboratory of Interface Science and Engineering in Advanced Materials, Taiyuan University of Technology, Taiyuan, 030024, China.

\*Corresponding author. E-mail address: haoyuying@tyut.edu.cn, wyc@tyut.edu.cn

<sup>†</sup> The authors made same contribution in this paper.

---

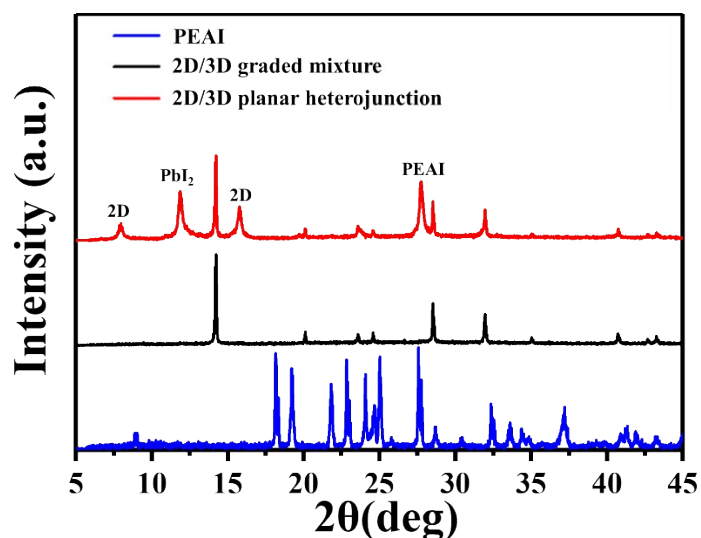

**Figure S1** XRD patterns of PEA1 and 2D/3D perovskite films based on higher concentrations of PEA1 in isopropanol (4mg/ml).

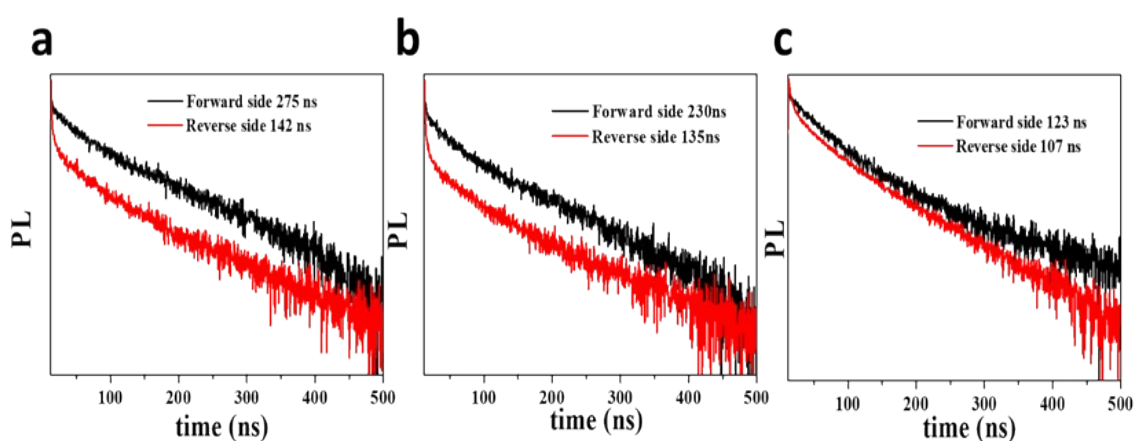

**Figure S2** Time-resolved PL decay curves of (a) 2D/3D gradient mixture perovskite film, (b) 2D/3D planar heterojunction perovskite film and (c) regular 3D perovskite film measured from front and back side, respectively

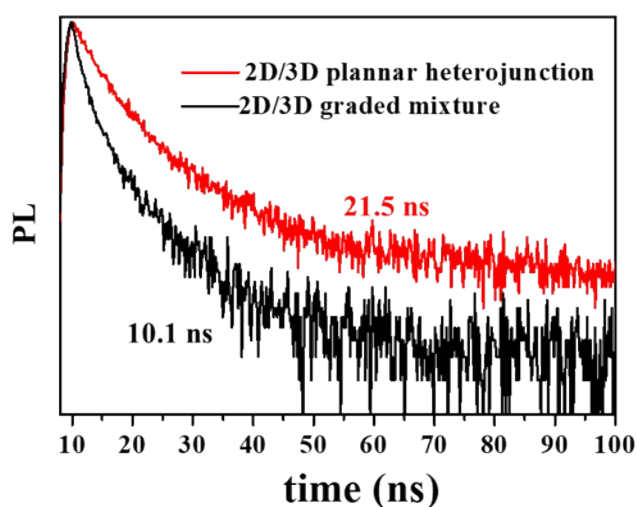

**Figure S3.** Time-resolved PL decay curves for 2D/3D gradient and 2D/3D planar heterojunction films with [6,6]-phenyl-C61-butyric acid methyl ester (PCBM) as electron extraction layer.

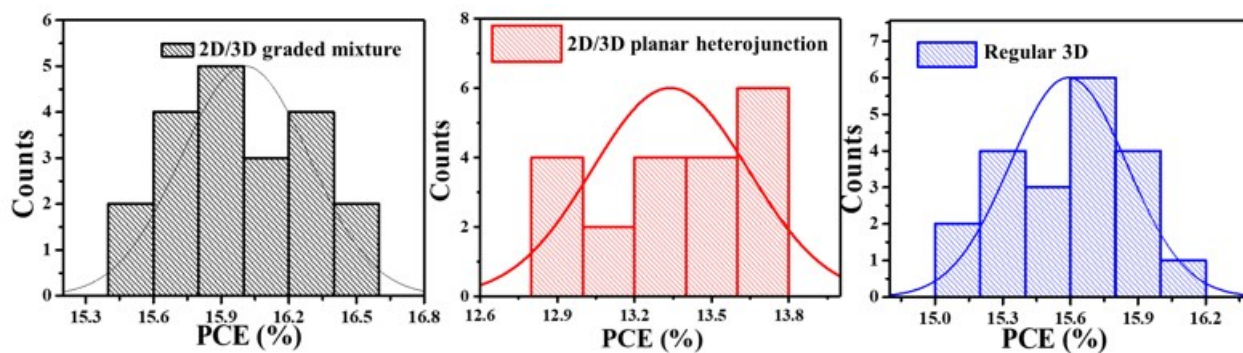

**Figure S4** The PCE histogram of 2D/3D gradient mixture, 2D/3D planner

heterojunction, and regular 3D PSCs.

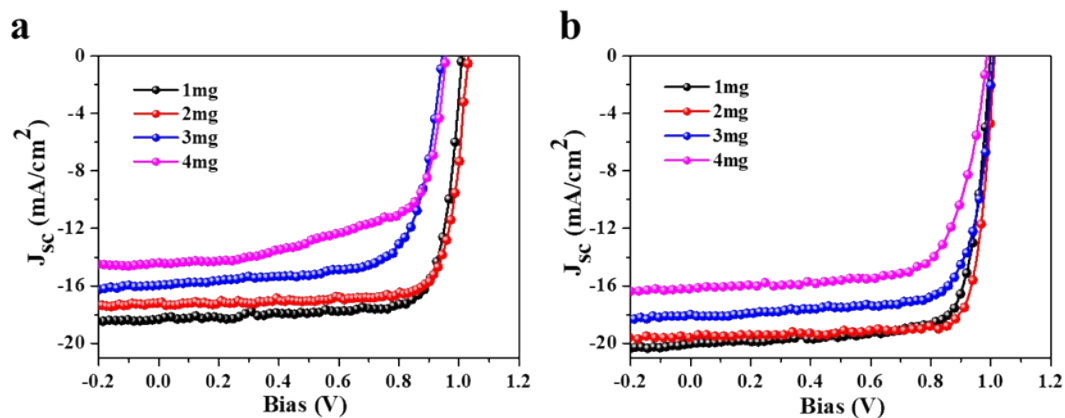

**Figure S5.** J-V characteristics of (a) 2D/3D planar heterojunction cells with different PEAi concentration, (b) 2D/3D gradient mixture cells with different PEAi concentration.

**Table S1** Performance parameters of the PSCs based on 2D/3D mixture perovskite film made by PEAi-treatment with different concentration DMF additive. The data were obtained based on 20 devices for each kind.

| DMF     | $V_{oc}$ (V) | $J_{sc}$ (mA/cm <sup>2</sup> ) | FF (%)   | PCE (%)    | BEST PCE (%) |
|---------|--------------|--------------------------------|----------|------------|--------------|
| without | 1.04±0.01    | 16.88±0.26                     | 76.3±0.7 | 13.34±0.29 | 13.72        |
| 0.5%    | 1.03±0.01    | 18.27±0.28                     | 79.9±0.6 | 15.04±0.33 | 15.52        |
| 1%      | 1.02±0.01    | 19.52±0.36                     | 80.2±0.4 | 16.01±0.28 | 16.46        |
| 1.5%    | 0.97±0.01    | 19.55±0.33                     | 75.8±0.6 | 14.39±0.42 | 14.91        |

**Table S2** Performance parameters of the PSCs based on 2D/3D mixture perovskite film made by PEAI-treatment (without DMF) with different PEAI concentration. The data were obtained based on 20 devices for each kind.

| concentration | $V_{oc}$ (V) | $J_{sc}$ (mA/cm <sup>2</sup> ) | FF (%)   | PCE (%)    | BEST PCE (%) |
|---------------|--------------|--------------------------------|----------|------------|--------------|
| 1mg           | 1.01±0.01    | 18.25±0.52                     | 77.1±0.4 | 14.21±0.30 | 14.68        |
| 2mg           | 1.04±0.01    | 16.88±0.26                     | 76.3±0.7 | 13.34±0.29 | 13.72        |
| 3mg           | 1.00±0.01    | 15.54±0.59                     | 71.1±0.5 | 11.04±0.37 | 11.63        |
| 4mg           | 0.96±0.01    | 14.23±0.33                     | 65.4±0.8 | 8.93±0.44  | 9.54         |

**Table S3** Performance parameters of the PSCs based on 2D/3D mixture perovskite film made by PEAI-treatment (with 1% DMF) with different PEAI concentration. The data were obtained based on 20 devices for each kind.

| concentration | $V_{oc}$ (V) | $J_{sc}$ (mA/cm <sup>2</sup> ) | FF (%)   | PCE (%)    | BEST PCE (%) |
|---------------|--------------|--------------------------------|----------|------------|--------------|
| 1mg           | 1.00±0.01    | 19.98±0.43                     | 78.9±0.4 | 15.77±0.35 | 16.29        |
| 2mg           | 1.02±0.01    | 19.52±0.36                     | 80.2±0.4 | 16.01±0.28 | 16.46        |
| 3mg           | 1.01±0.01    | 18.14±0.61                     | 75.8±0.5 | 13.89±0.33 | 14.54        |
| 4mg           | 0.98±0.01    | 16.39±0.56                     | 70.2±0.6 | 11.28±0.46 | 11.90        |

**Table S4** Performance parameters of the PSCs based on 2D/3D mixture perovskite film made by BAI-treatment with different concentration DMF additive. The data were obtained based on 20 devices for each kind.

| DMF     | $V_{oc}$ (V) | $J_{sc}$ (mA/cm <sup>2</sup> ) | FF (%)   | PCE (%)    | BEST PCE (%) |
|---------|--------------|--------------------------------|----------|------------|--------------|
| Without | 1.05±0.02    | 16.54±0.61                     | 77.1±0.8 | 13.40±0.29 | 13.88        |
| 0.5%    | 1.02±0.01    | 18.06±0.44                     | 79.5±0.7 | 14.64±0.33 | 15.15        |
| 1%      | 1.02±0.01    | 19.21±0.36                     | 80.0±0.4 | 15.67±0.28 | 16.17        |
| 1.5%    | 0.99±0.02    | 19.06±0.39                     | 75.1±0.6 | 14.17±0.39 | 14.71        |

**Table S5** Performance parameters of the PSCs based on 2D/3D mixture perovskite film made by PAI-treatment with different concentration DMF additive. The data were obtained based on 20 devices for each kind.

| DMF     | V <sub>oc</sub> (V) | J <sub>sc</sub> (mA/cm <sup>2</sup> ) | FF (%)   | PCE (%)    | BEST PCE (%) |
|---------|---------------------|---------------------------------------|----------|------------|--------------|
| Without | 1.02±0.01           | 18.15±0.53                            | 77.9±0.6 | 14.45±0.33 | 14.97        |
| 0.5%    | 0.99±0.01           | 19.12±0.69                            | 79.1±0.4 | 15.02±0.37 | 15.54        |
| 1%      | 0.99±0.01           | 19.57±0.61                            | 79.6±0.5 | 15.43±0.41 | 15.95        |
| 1.5%    | 0.97±0.01           | 18.43±0.55                            | 74.4±0.7 | 13.37±0.53 | 13.99        |
